# 1 Perforin-2 limits pathogen proliferation at the maternal-fetal interface

2

3 *Petoria Gayle\**, *Vanessa McGaughey\**, *Rosmely Hernandez\**, *Marina Wylie\*†*, *Rachel C.*

4 *Colletti\*†*, *Ka Lam Nguyen\*†*, *Marshall Arons\**, *Laura Padula\**, *Natasa Strbo\**, *Kurt Schesser\**

5

6 \*Department of Microbiology & Immunology, University of Miami Miller School of Medicine,

7 Miami, FL, USA

8

9 Corresponding Author: Kurt Schesser, Department of Microbiology and Immunology, University  
10 of Miami Miller School of Medicine, 1600 NW 10<sup>th</sup> Avenue, Miami, FL 33136.

11 [kschesser@med.miami.edu](mailto:kschesser@med.miami.edu)

12

13 † Current addresses: Uniformed Services University of the Health Sciences, Bethesda, MD (MW);  
14 Philadelphia College of Osteopathic Medicine, Philadelphia, PA (RCC); The University of Illinois  
15 at Urbana-Champaign, Champaign, IL (KLN).

16

17 PG and KS conceived the project, designed the experiments, and interpreted the data. All  
18 experiments and data collection were performed by PG with assistance by VM, RH, MW, RCC,  
19 KLN, MA, and KS. Contributions to the development of methodologies were made by LP and NS.

20 The manuscript was primarily written by PG with assistance by KS.

21 *Abstract:*

22 Placental immune responses are highly regulated to strike a balance between protection and  
23 tolerance. For relatively mild infections, protection encompasses both the mother and fetus;  
24 however, during worsening conditions, protection becomes exclusively reserved for the mother.  
25 Previously, we and others have shown that the host factor Perforin-2 plays a central role in  
26 protecting mice and cells against infection. Here, we analyzed Perforin-2 activity in the mouse  
27 placenta to determine whether Perforin-2 plays a similarly protective role. We show that Perforin-  
28 2 is critical for inhibiting *Listeria monocytogenes* colonization of the placenta and fetus and that  
29 this protection is due to both maternal and fetal-encoded Perforin-2. *Perforin-2* mRNA is readily  
30 detectable in individual immune cells of the decidua and these levels are further enhanced  
31 specifically in decidual macrophages during high-dose infections that result in fetal expulsion.  
32 Unexpectedly, inductive Perforin-2 expression in decidual macrophages did not occur during  
33 milder infections in which fetal viability remained intact. This pattern of expression significantly  
34 differed from that observed in splenic macrophages in which inductive Perforin-2 expression was  
35 observed in both high and mild infection conditions. In the placenta, inductive Perforin-2  
36 expression in decidual macrophages was co-incident with their polarization from a M2 to M1  
37 phenotype that normally occurs in the placenta during high-burden infections. Our results suggest  
38 that Perforin-2 is part of a host response that is protective either for both the mother and fetus in  
39 milder infections or exclusively for the mother during high-dose infections.

40 *Introduction:*

41           The balance between host defense and tolerance during pregnancy is achieved both by the  
42 modulation of the maternal immune system towards the semi-allogenic fetus as well as through  
43 the barrier function of the placenta. Despite these safeguards, infections contribute approximately  
44 25% of stillbirths in the United States, largely due to the ability of specific pathogens, including  
45 *Listeria monocytogenes*, to colonize the placenta (McClure et al. 2010). *L. monocytogenes* is  
46 widely used in hematogenous infection models to study host-pathogen interactions in the placenta  
47 (Lamond and Freitag 2018). While these models have advanced our understanding of the  
48 pathogenesis of placental infections, there still remains the need to further understand the  
49 mechanisms of immune defense in coordination with fetal tolerance during placental infection.

50           Numerous studies have shown that infections during pregnancy can disrupt the highly  
51 controlled inflammatory response and result in pregnancy complications such as miscarriages or  
52 spontaneous abortion (Kim et al. 2005; Mor et al. 2017; Rodrigues-Duarte et al. 2018). These  
53 pregnancy related complications are commonly attributed to the activation of the innate immune  
54 response. Specifically, macrophages of the decidua, the maternal component of the placenta, have  
55 been shown to be highly dynamic during pregnancy. These cells change and respond to the  
56 inflammatory environment of the placenta expressing characteristics of the classically activated  
57 phenotype, M1, in early and late pregnancy and resembling the M2 phenotype during the mid-  
58 stage of pregnancy (Shapouri-Moghaddam et al. 2018; Zhang et al. 2017). Excessive levels of pro-  
59 inflammatory M1 macrophages have been linked to abnormal pregnancy outcomes including pre-  
60 term labor and fetal mortality (Jena et al. 2019; Svensson-Arvelund and Ernerudh 2015; Wang et  
61 al. 2011; Xu et al. 2016). It has also been shown that *L. monocytogenes* can trigger M1 polarization  
62 in the placenta (Benoit et al. 2008). Studying the role of innate immune factors within the placenta

63 is important to enhance our understanding of how to prevent the devastating effects of infection  
64 during pregnancy.

65 In vertebrates there are three pore-forming factors that protect against microbial pathogens.  
66 Complement component 9 (C9) and Perforin-1 possess membrane-attack-complex-perforin  
67 (MACPF) domains that mediate their polymerization and pore formation. The third and most  
68 recently identified vertebrate MACPF-containing factor, Perforin-2, is found in the earliest  
69 evolved animals, and is ancestral to C9 and Perforin-1 (D'Angelo et al. 2012). Unlike the  
70 Complement Factors and Perforin-1 that are secreted from cells, Perforin-2 is an integral  
71 membrane protein. In human and mouse cells *Perforin-2* mRNA is constitutively present in  
72 macrophages and is induced in fibroblastic cells following infection or exposure to inflammatory  
73 signals (McCormack et al. 2013). Perforin-2 plays a major role in protecting mice from *Listeria*,  
74 *Salmonella*, *Staphylococcus*, and *Yersinia* infections (McCormack et al. 2015a; 2015b; 2016). *In*  
75 *vitro*, Perforin-2 restricts intracellular *L. monocytogenes* proliferation by a pH-dependent  
76 mechanism in both primary peritoneal macrophages and fibroblastic cells suggesting that the rapid  
77 development of listeriosis in *Perforin-2* *-/-* mice is due to defects in cellular killing activity  
78 (McCormack et al. 2016). Recently it has been shown that Perforin-2 directly impacts type I  
79 interferon signaling by physically interacting with the IFN- $\alpha$  and  $-\beta$  receptors 1 and 2 (McCormack  
80 et al. 2020). Whether the bactericidal activity of Perforin-2 involves the interferon signaling  
81 machinery remains to be determined.

82 Here we tested whether Perforin-2 plays a protective role in limiting colonization of *L.*  
83 *monocytogenes* in the mouse placenta. Additionally, we analyzed *Perforin-2* mRNA expression in  
84 individual cells of the placenta following infection to determine whether *Perforin-2* expression  
85 levels change during infection.

86 *Materials and Methods:*

87 *Mice, microbes, and infections*

88 Wild-type BALB/c and C57BL/6 *Perforin-2* <sup>+/+</sup> and *Perforin-2* <sup>-/-</sup> littermates (McCormack et al.  
89 2015a) were bred in the animal care facility at the University of Miami Miller School of Medicine,  
90 Miami, FL. All animal procedures were approved by the Institutional Animal Care and Use  
91 Committee, University of Miami Miller School of Medicine (protocol 19-075). Animals were  
92 housed under a circadian cycle (12hr light/12hr dark cycle). Virgin female mice were mated  
93 between 6 - 12 weeks of age, and checked daily for estrous stage and copulatory plugs. Presence  
94 of a plug was denoted as gestation day (GD) 0.5. Weight gain was monitored on GD 4.5 through  
95 GD 12.5 to confirm pregnancy. *L. monocytogenes* (10403S) were grown in brain heart infusion  
96 media at 37 °C with vigorous shaking to mid-log phase. Mice at GD 12.5 were infected  
97 intravenously with doses as indicated in figure legends. At 44 hours post infection (hpi), mice were  
98 humanely euthanized and uterine horns, livers, and spleens were removed and processed for either  
99 single cell analysis (see below) or colony forming unit (CFU) assays. For CFU assays, placentas  
100 (including decidual tissue), fetuses, and livers were further dissected and homogenized using a fine  
101 wire mesh to grind the tissues in sterile water containing 0.05% Tween. The resulting tissue  
102 homogenates were diluted and plated on Luria Broth agar to determine *L. monocytogenes* titers. In  
103 the experiments using heterogenic matings, fetal tissue homogenates were used for genotyping.

104 *Preparation of single-cell suspensions*

105 Following their removal, uterine horns were dissected to remove individual fetal-placental units  
106 (FPU), each FPU was further dissected to isolate decidual tissue. Livers (minced) and pooled  
107 deciduae were incubated in 2 mg/mL collagenase D (Roche) at 37 °C for 30 – 40 minutes with  
108 agitation. The resulting cell suspensions were then washed with cold IMDM (Life Technologies)

109 + 10% heat-inactivated FBS (Sigma-Aldrich), passed through a 70  $\mu$ m filter followed by passaging  
110 through a 40  $\mu$ m filter (VWR International, Radnor, PA). Spleens were gently homogenized  
111 through 70  $\mu$ m filters and similarly washed and passed through 40  $\mu$ m filters. The resulting single  
112 cells were then centrifuged at 500g for 5 min at 4°C, treated with ACK Lysing Buffer (Life  
113 Technologies Corporation) for 5 minutes to remove red blood cells, and finally washed with  
114 IMDM + 10% FBS. Total viable cells were determined using the Vi-Cell XR Cell Viability  
115 Analyzer (Beckman Coulter).

#### 116 *Single cell analysis*

117 Isolated cells were washed in FACS staining buffer and incubated with anti-CD16/32 (clone  
118 2.4G2) to block FcRs for 10 mins followed by an incubation with Live/Dead fixable yellow dead  
119 cell stain (ThermoFisher) and fluorescent-conjugated monoclonal antibodies (mAbs) for 30 min.  
120 The following anti-mouse mAbs were used for analysis: CD45 (30-F11; BioLegend), CD3 (17A2;  
121 BioLegend), F4/80 (BM8; BioLegend), CD11b (M1/70; BioLegend), Ly6C (HK1.4; BioLegend),  
122 Ly6G (1A8; BioLegend), CD335 (29A1.4; BioLegend), MHC II (M5/114.15.2; BD Biosciences),  
123 CD206 (C068C2; BioLegend). Depending on the experiment, samples were either immediately  
124 analyzed by flow cytometry using a Sony SP6800 Spectral Analyzer or further processed to  
125 determine *Perforin-2* mRNA levels. Branched oligonucleotide signal amplification was used to  
126 determine *Perforin-2* mRNA levels in individual cells (PrimeFlow; ThermoFisher Scientific).  
127 Briefly, single cell suspensions were stained for surface antigens as described above, then fixed,  
128 permeabilized, and incubated with probes specific for *Perforin-2* transcripts (Assay Id: VB1-  
129 20172-PF; ThermoFisher Scientific). Cells were then subjected to a series of signal amplification  
130 cycles and then analyzed by flow cytometry as described above using FlowJo software (BD  
131 Biosciences).

132 *Results:*

133 *Perforin-2 limits pathogen colonization at the maternal-fetal interface*

134 Pregnant wild-type and isogenic Perforin-2-deficient (*Perforin-2* *-/-*) mice were infected  
135 intravenously on gestation day (GD) 12.5 (i.e., mid-gestation) with *L. monocytogenes*. At 44 hours  
136 post infection, dams were humanely euthanized and livers and fetal placental units (FPU) were  
137 evaluated for *L. monocytogenes* by colony forming unit (CFU) assay. In infected *Perforin-2* *+/+*  
138 dams, 54% (12/22) of the placentas and 14% (3/22) of fetuses possessed detectable levels of *L.*  
139 *monocytogenes* (**Fig. 1**). Dosages that result in approximately 50% of placentas in *Perforin-2* *+/+*  
140 mice becoming infected will henceforth be referred to as placental dose 50 (PD<sub>50</sub>). In contrast,  
141 *Perforin-2* *-/-* mice harboring comparable levels of *L. monocytogenes* in the liver as *Perforin-2*  
142 *+/+* dams, 88% (15/17) of the placentas and 71% (12/17) of fetuses possessed detectable levels of  
143 *L. monocytogenes*. These results suggest that Perforin-2 may play a significant role in limiting *L.*  
144 *monocytogenes* colonization of the placenta and fetus.

145

146 *Maternal and fetal-derived Perforin-2 contributes to protection against infection in the placenta*

147 The placenta is a chimeric organ that consists of maternally-derived tissue and fetal-derived  
148 trophoblast cells. A heterogenic mating strategy was used to evaluate the specific contributions of  
149 maternal- and fetal-derived Perforin-2 in limiting *L. monocytogenes* colonization in the placenta.  
150 Initially, *Perforin-2* *-/-* female mice were crossed to *Perforin-2* *+/-* males (generating  
151 approximately 50% *Perforin-2* *+/-* and 50% *Perforin-2* *-/-* fetuses) and at GD 12.5, dams were  
152 infected with PD<sub>50</sub> *L. monocytogenes* and analyzed as described above. A representative dam is  
153 shown in which the infection burdens of FPUs containing *Perforin-2* *+/-* fetuses are generally  
154 lower than FPUs containing *Perforin-2* *-/-* fetuses (**Fig. 2A**). In compiled data from 5 dams, the

155 placentas associated with *Perforin-2* +/- fetuses (designated as T(+/-)) had significantly lower  
156 infection burdens compared to placentas associated with *Perforin-2* -/- fetuses (designated as T(-  
157 -/-)). A similar reduction in infection burden was observed in *Perforin-2* +/- fetuses compared to  
158 *Perforin-2* -/- fetuses (**Fig. 2B**) indicating that fetal-derived Perforin-2 protects the placenta from  
159 infection. In reciprocal matings, in which *Perforin-2* +/- female mice were crossed with *Perforin-*  
160 *2* -/- males and infected at GD 12.5, a more modest protective effect of fetal-derived Perforin-2  
161 was observed (**Fig. 2C**), possibly indicating that maternal-derived Perforin-2 partially masks the  
162 protective effect of fetal-derived Perforin-2. Collectively these data show that both maternal- and  
163 fetal-derived Perforin-2 contribute to protecting the placenta from being colonized by a bloodborne  
164 pathogen.

165

166 *Perforin-2* expression is induced in placental immune cells following infection

167 The maternal component of the placenta, the decidua, is the initial colonization site of various  
168 bloodborne pathogens including *L. monocytogenes* (Rizzuto et al. 2017). We initially analyzed the  
169 cellular composition of the decidua and the liver in uninfected and infected mid-gestation mice.  
170 Previously we and others showed that the immune cell composition in the liver in non-pregnant  
171 mice undergoes substantial changes following *L. monocytogenes* infection (Gregory et al. 2002;  
172 Blériot et al. 2015; Gayle et al. 2019). There was a similar pattern of changes in the liver observed  
173 in mid-gestation pregnant mice following infection, including a marked disappearance of resident  
174 macrophages (CD11b<sup>lo</sup>/F4/80<sup>+</sup>) and the infiltration of inflammatory monocytes and neutrophils  
175 (CD11b<sup>+</sup>/F4/80<sup>-</sup>) (**Fig. 3A**). In contrast, in the decidua of the same mice, there were no significant  
176 changes in the resident macrophages (CD11b<sup>+</sup>/F4/80<sup>+</sup>) or other cell types following infection (**Fig.**  
177 **3B**). From GD 12.5 – 14.5 pregnant mice approximately a million cells are typically isolated from



178 individual decidua of which ~20% are CD45<sup>+</sup>. The 4 x 10<sup>5</sup> CD45<sup>+</sup> cells per decidua is composed  
179 of approximately 20% CD11b<sup>-</sup>/F480<sup>-</sup> (primarily NK cells), 30% CD11b<sup>+</sup>/F480<sup>-</sup> (monocytes and  
180 neutrophils), and 40% CD11b<sup>+</sup>/F480<sup>+</sup> (macrophages).

181 *Perforin-2* mRNA levels were assayed in individual decidual cells to determine both cell  
182 type-specific expression and whether expression levels change following infection. To ensure that  
183 all placentas within each pregnant mouse became colonized by *L. monocytogenes* during the 44 hr  
184 infection period, the doses used for these experiments will be referred to as placental dose 100%  
185 (PD<sub>100</sub>) that are 2- to 4-fold higher than the 'low-dose' experiments shown in Figs. 1 and 2. As  
186 described earlier, pregnant mice (GD 12.5) were either left uninfected or infected with *L.*  
187 *monocytogenes* and following 44 hours of infection, FPU were collected and placentas were  
188 further dissected to isolate decidual cells. Pooled decidual cells from each individual dam were  
189 analyzed for cell surface markers and *Perforin-2* mRNA levels. In uninfected dams, *Perforin-2*  
190 mRNA was readily detected in CD45<sup>+</sup> decidual cells and this signal was enhanced 2- to 3-fold in  
191 CD45<sup>+</sup> decidual cells isolated from infected dams (**Fig. 4A, B**). A similar 2- to 3-fold infection-  
192 dependent increase in *Perforin-2* mRNA levels was also observed in CD45<sup>+</sup> splenic cells derived  
193 from the same mice (**Fig. 4C**).

194 Of the three major CD45<sup>+</sup> subsets found in the GD 12.5 decidua of BALB/c mice (see **Fig.**  
195 **3B**), infection-induced enhancement of *Perforin-2* mRNA levels occurred primarily in the  
196 CD11b<sup>+</sup>F4/80<sup>+</sup> macrophages (**Fig. 5A,B**). This infection-induced increase also occurred in the  
197 CD45<sup>+</sup> splenic macrophages derived from the same mouse (**Fig. 5C**). In addition, *Perforin-2*  
198 mRNA was also specifically induced in infected decidual and splenic CD11b<sup>+</sup>F4/80<sup>+</sup> macrophages  
199 isolated from C57BL/6 mice (**Fig. 5D-F**). These data show that *Perforin-2* mRNA levels increase  
200 in immune cells of the decidua following infection and that this increase primarily occurs in

201 macrophages.

202

203 *Reduced infection dosages result in modest changes in Perforin-2 mRNA levels in decidual*  
204 *macrophages*

205 As noted earlier, the *Perforin-2* expression experiments shown in Figs. 4 and 5 used infective doses  
206 (PD<sub>100</sub>) that resulted in all placentas becoming colonized with *L. monocytogenes* by 44 hpi.  
207 Unexpectedly, when these experiments were performed with 2- to 4-fold lower doses of *L.*  
208 *monocytogenes* in which approximately 50% of placentas had become colonized by *L.*  
209 *monocytogenes* by 44 hpi (PD<sub>50</sub>), there was little to no difference in *Perforin-2* mRNA levels  
210 between decidual macrophages isolated from uninfected and infected GD 12.5 pregnant mice (**Fig.**  
211 **6A,B**). In contrast, in the same mice *Perforin-2* mRNA levels were significantly elevated in splenic  
212 macrophages isolated from infected mice compared to uninfected mice (**Fig. 6C**). A similar pattern  
213 of *Perforin-2* expression in decidual and splenic macrophages was observed in pregnant GD 12.5  
214 C57BL/6 mice infected at PD<sub>50</sub> (**Fig. 6D,E**). These findings suggest that in the placenta there is a  
215 bacterial dose-dependent induction of *Perforin-2* mRNA.

216

217 *Perforin-2 mRNA levels are elevated in M1 decidual macrophages*

218 In humans and mice, decidual macrophages at mid-gestation are primarily of the M2 phenotype  
219 and polarization of these macrophages to the inflammatory M1 phenotype is associated with a  
220 variety of complications that can lead to premature pregnancy termination (Brown et al. 2014; Jena  
221 et al. 2019; Svensson-Arvelund and Ernerudh 2015; Xu et al. 2016). To determine the infection-  
222 specific phenotype of decidual macrophages in our model, pregnant GD 12.5 mice were either left  
223 uninfected or infected with *L. monocytogenes* at PD<sub>100</sub>. Following their isolation, decidual cells

224 were stained for M1 and M2 specific markers and analyzed by flow cytometry. Macrophages were  
225 defined as single, live, CD45<sup>+</sup>, CD11b<sup>+</sup>, F4/80<sup>+</sup>, Ly6C<sup>lo</sup>, and Ly6G<sup>-</sup> cells (**Fig. 7A**). Macrophages  
226 were then further classified as either M1 (CD206<sup>-</sup> MHCII<sup>hi</sup>) or M2 (CD206<sup>+</sup> MHCII<sup>lo</sup>) in  
227 uninfected and infected dams. Consistent with previously published findings cited above, decidual  
228 macrophages isolated from uninfected dams were primarily M2. In contrast, decidual macrophages  
229 isolated from infected dams contained lower frequencies of CD206<sup>+</sup> cells and higher frequency of  
230 MHCII cells indicative of a M1-skewed phenotype (**Fig. 7**). When GD 12.5 mice were infected  
231 with a reduced dose (PD<sub>50</sub>) of *L. monocytogenes*, the M1/M2 distribution of decidual macrophages  
232 at 44 hpi did not appreciatively differ from that observed in decidual macrophages isolated from  
233 uninfected GD 12.5 mice (*not shown*).

234 Decidual macrophages isolated from uninfected dams at mid-term pregnancy (GD 12.5)  
235 were stained for M1 and M2 specific markers as described above and subsequently analyzed for  
236 *Perforin-2* mRNA levels. In every pregnant mouse examined, *Perforin-2* mRNA levels were  
237 notably elevated in M1 decidual macrophages compared to M2 decidual macrophages (**Fig. 8**).  
238 Collectively, these data show that at high pathogen burdens M1 macrophages with heightened  
239 *Perforin-2* mRNA levels predominate in the placenta.

240 *Discussion:*

241 A unique challenge in both the operation as well as the study of immune responses  
242 occurring during pregnancy is that protection for the host may not always encompass the fetus.  
243 While the placenta acts as an immunological and physical barrier for fetal protection, it is  
244 susceptible to pathogens capable of colonizing this tissue and, under worsening conditions, can  
245 reorient towards an exclusively maternal protective response (Robbins and Bakardjiev 2012;  
246 Zeldovich and Bakardjiev 2012; Bonney and Johnson 2019; Jena et al. 2019). Decidual  
247 macrophages have been shown to be critical for the plasticity of the placental response in being  
248 important for both the maintenance of fetal tolerance as well as responding to inflammatory and/or  
249 infectious conditions that can result in immune activation against the fetus (Brown et al. 2014;  
250 Wang et al. 2018).

251 We show here that Perforin-2 plays a significant role during *L. monocytogenes* infection in  
252 the placenta and fetus. We additionally found that fetal-derived Perforin-2 in the placenta  
253 contributes to limiting *L. monocytogenes* infection, although there is a dominance in regards to the  
254 maternal expression of Perforin-2. These findings are consistent with published data showing that  
255 the maternal-derived decidua is the initial site of infection and the first line of defense in  
256 bloodborne *L. monocytogenes* infections (Rizzuto et al. 2017). In analysis of *Perforin-2* mRNA  
257 levels in individual decidual cells, we found that CD45<sup>+</sup> cells possessed abundant transcripts, and  
258 specific to decidual macrophages, these levels became elevated in infections with high pathogen  
259 loads. This inductive *Perforin-2* expression in decidual macrophages correlated with their  
260 polarization from the tolerogenic M2 phenotype to the inflammatory M1 phenotype. In these  
261 experiments with high pathogen loads (i.e., PD<sub>100</sub>; 5 – 10 x 10<sup>5</sup> CFU), dams often displayed typical  
262 signs of listeriosis at 44 hpi including ruffled fur, hunched backs, and slowed movement. Also

263 there would occasionally be FPU observed in the cage housing presenting with darkened uterine  
264 horns and loss of fetal structures in remaining fetuses, all indicative of maternal immune activation  
265 (MIA) (Goldstein et al. 2017). In contrast, there was little to no inductive *Perforin-2* expression in  
266 decidual macrophages in infections with relatively lower pathogen loads (i.e., PD<sub>50</sub>; 2 x 10<sup>5</sup> CFU)  
267 in which neither disease symptoms nor fetal expulsions occur. These findings indicate that  
268 inductive *Perforin-2* expression in deciduae is associated with a pathological shift in macrophage  
269 phenotype.

270 In understanding *Perforin-2* expression in decidual macrophages, it is worth noting that  
271 there are three immunological stages of pregnancy (Mor et al. 2017). At the early stage of  
272 pregnancy, when the blastocyst is implanted into the uterine wall, there is increased inflammation  
273 and a Th<sub>1</sub>-biased environment, during which there is a predominance of M1 macrophages in the  
274 decidua. It has been shown that this inflammation is not in response to the invading fetal antigens  
275 but that there is an active recruitment by the trophoblast cells in an effort to educate immune cells  
276 towards fetal tolerance. The mid-stage of pregnancy is a period of fetal growth and when fetal  
277 tolerance is the most important, as pathological conditions that lead to MIA can result in a breach  
278 of fetal tolerance and therefore fetal rejection (Mor et al. 2017). In line with this, the mid-term of  
279 pregnancy represents an anti-inflammatory state, generating a tolerogenic Th<sub>2</sub>-type immune  
280 environment in which M2 macrophages dominate within deciduae. Lastly, the late stage of  
281 pregnancy again requires inflammation that is necessary for labor induction and is characterized  
282 by a Th<sub>1</sub> immune response in which again there is a predominance of M1 macrophages.

283 Pathogens capable of crossing the placental barrier can take advantage of the anti-  
284 inflammatory microenvironment of the placenta during the mid-stage of pregnancy. However,  
285 once a certain threshold is reached and MIA occurs, fetal tolerance can be disrupted and result in

286 pregnancy termination (Bonney and Johnson 2019). Perforin-2 serves both a protective function  
287 in sub-MIA infections (i.e., as shown in the PD<sub>50</sub> experiments [Figs. 1 and 2]) as well as becoming  
288 elevated during infections in which MIA is triggered (Fig. 5). Collectively, our investigation may  
289 indicate that Perforin-2 is a component that acts to protect either both the mother and fetus (sub-  
290 MIA infections) or exclusively the mother (MIA infections).

291 *References:*

292 Benoit M, Desnues B, Mege JL. Macrophage polarization in bacterial infections. *J Immunol.*  
293 2008 Sep 15;181(6):3733-9.

294

295 Blériot C, Dupuis T, Jouvion G, Eberl G, Disson O, Lecuit M. Liver-  
296 resident macrophage necroptosis orchestrates type 1 microbicidal inflammation and type-2-  
297 mediated tissue repair during bacterial infection. *Immunity.* 2015 Jan 20;42(1):145-58

298

299 Bonney EA, Johnson MR. The role of maternal T cell and macrophage activation in preterm  
300 birth: Cause or consequence? *Placenta.* 2019 Apr;79:53-61.

301

302 Brown MB, von Chamier M, Allam AB, Reyes L. M1/M2 macrophage polarity in normal and  
303 complicated pregnancy. *Front Immunol.* 2014 Nov 24;5:606.

304

305 Gayle P, Freitag NE, Strbo N, Schesser K. Using a Bacterial Pathogen to Probe for Cellular and  
306 Organismic-level Host Responses. *J Vis Exp.* 2019 Feb 22;(144).

307

308 Goldstein JA, Norris SA, Aronoff DM. DOHaD at the intersection of maternal immune  
309 activation and maternal metabolic stress: a scoping review. *J Dev Orig Health Dis.* 2017  
310 Jun;8(3):273-283.

311

312 Gregory SH, Cousens LP, van Rooijen N, Döpp EA, Carlos TM, Wing EJ. Complementary  
313 adhesion molecules promote neutrophil-Kupffer cell interaction and the elimination of bacteria  
314 taken up by the liver. *J Immunol.* 2002 Jan 1;168(1):308-15.

315

316 Jena MK, Nayak N, Chen K, Nayak NR.

317 Role of Macrophages in Pregnancy and Related Complications.

318 *Arch Immunol Ther Exp (Warsz).* 2019 Oct;67(5):295-309.

319

320 Kim S, Lee DS, Watanabe K, Furuoka H, Suzuki H, Watarai M. Interferon-  
321 gamma promotes abortion due to Brucella infection in pregnant mice. BMC Microbiol. 2005  
322 May 4;5:22.  
323  
324 Lamond NM, Freitag NE. Vertical Transmission of *Listeria monocytogenes*: Probing the Balance  
325 between Protection from Pathogens and Fetal Tolerance. Pathogens. 2018 May 25;7(2).  
326  
327 Rizzuto G, Tagliani E, Manandhar P, Erlebacher A, Bakardjiev AI. Limited Colonization  
328 Undermined by Inadequate Early Immune Responses Defines the Dynamics of Decidual  
329 Listeriosis. Infect Immun. 2017 Jul 19;85(8).  
330  
331 Li W, Chang Y, Liang S, Zhong Z, Li X, Wen J, Zhang Y, Zhang J, Wang L, Lin H, Cao X,  
332 Huang H, Zhong F. NLRP3 inflammasome activation contributes to *Listeria monocytogenes*-  
333 induced animal pregnancy failure. BMC Vet Res. 2016 Feb 24;12:36.  
334  
335 McClure EM, Dudley DJ, Reddy UM, Goldenberg RL. Infectious causes of stillbirth:  
336 a clinical perspective. Clin Obstet Gynecol. 2010 Sep;53(3):635-45.  
337  
338 McCormack R, and Eckhard R. Podack. 2015. "Perforin-2/Mpeg1 and Other Pore-Forming  
339 Proteins throughout Evolution." *Journal of Leukocyte Biology* 98(5):761–68.  
340  
341 McCormack R, Bahnan W, Shrestha N, Boucher J, Barreto M, Barrera CM, Dauer EA, Freitag  
342 NE, Khan WN, Podack ER, Schesser K. Perforin-2 Protects Host Cells and Mice by Restricting  
343 the Vacuole to Cytosol Transitioning of a Bacterial Pathogen. Infect Immun. 2016 Mar  
344 24;84(4):1083-1091.  
345  
346 McCormack R, de Armas LR, Shiratsuchi M, Ramos JE, Podack ER. Inhibition of intracellular  
347 bacterial replication in fibroblasts is dependent on the perforin-like protein (perforin-2) encoded  
348 by macrophage-expressed gene 1. J Innate Immun. 2013;5(2):185-94.  
349



350 McCormack RM, de Armas LR, Shiratsuchi M, Fiorentino DG, Olsson ML, Lichtenheld MG,  
351 Morales A, Lyapichev K, Gonzalez LE, Strbo N, Sukumar N, Stojadinovic O, Plano GV,  
352 Munson GP, Tomic-Canic M, Kirsner RS, Russell DG, Podack ER. Perforin-2 is essential for  
353 intracellular defense of parenchymal cells and phagocytes against pathogenic bacteria. *Elife*.  
354 2015 Sep 24;4. pii: e06508.  
355  
356 McCormack R, Hunte R, Podack ER, Plano GV, Shembade N. An Essential Role for Perforin-2  
357 in Type I IFN Signaling. *J Immunol*. 2020 Apr 15;204(8):2242-2256  
358  
359 Money KM, Barke TL, Serezani A, Gannon M, Garbett KA, Aronoff DM, Mirnics K.  
360 Gestational diabetes exacerbates maternal immune activation effects in the developing brain.  
361 *Mol Psychiatry*. 2018 Sep;23(9):1920-1928.  
362  
363 Mor G, Aldo P, Alvero AB. The unique immunological and microbial aspects of pregnancy. *Nat*  
364 *Rev Immunol*. 2017 Aug;17(8):469-482.  
365  
366 Rizzuto G, Tagliani E, Manandhar P, Erlebacher A, Bakardjiev AI.  
367 Limited Colonization Undermined by Inadequate Early Immune Responses Defines the Dynamic  
368 s of Decidual Listeriosis. *Infect Immun*. 2017 Jul 19;85(8).  
369  
370 Robbins JR, Bakardjiev AI. Pathogens and the placental fortress. *Curr Opin Microbiol*. 2012  
371 Feb;15(1):36-43.  
372  
373 Rodrigues-Duarte L, Pandya Y, Neres R, Penha-Gonçalves C. Fetal and Maternal Innate  
374 Immunity Receptors Have Opposing Effects on the Severity of Experimental Malaria in  
375 Pregnancy: Beneficial Roles for Fetus-Derived Toll-Like Receptor 4 and Type I Interferon  
376 Receptor 1. *Infect Immun*. 2018 Apr 23;86(5).  
377  
378 Shapouri-Moghaddam A, Mohammadian S, Vazini H, Taghadosi M, Esmaili SA, Mardani F,  
379 Seifi B, Mohammadi A, Afshari JT, Sahebkar A. Macrophage plasticity, polarization,  
380 and function in health and disease. *J Cell Physiol*. 2018 Sep;233(9):6425-6440

381  
382 Strbo N, Pastar I, Romero L, Chen V, Vujanac M, Sawaya AP, Jozic I, Ferreira ADF, Wong LL,  
383 Head C, Stojadinovic O, Garcia D, O'Neill K, Drakulich S, Taller S, Kirsner RS, Tomic-Canic  
384 M. Single cell analyses reveal specific distribution of anti-bacterial molecule Perforin-2 in  
385 human skin and its modulation by wounding and *Staphylococcus aureus* infection.  
386 *Exp Dermatol.* 2019 Mar;28(3):225-232.  
387  
388 Svensson-Arvelund J, Ernerudh J. The Role of Macrophages in Promoting and Maintaining  
389 Homeostasis at the Fetal-Maternal Interface. *Am J Reprod Immunol.* 2015 Aug;74(2):100-9  
390  
391 Wang WJ, Hao CF, Lin QD.  
392 Dysregulation of macrophage activation by decidual regulatory T cells in unexplained recurrent  
393 miscarriage patients. *J Reprod Immunol.* 2011 Dec;92(1-2):97-102.  
394  
395 Wang XQ, Zhou WJ, Hou XX, Fu Q, Li DJ. Trophoblast-  
396 derived CXCL16 induces M2 macrophage polarization that in turn inactivates NK cells at the  
397 maternal-fetal interface. *Cell Mol Immunol.* 2018 Dec;15(12):1038-1046  
398  
399 Xu Y, Romero R, Miller D, Kadam L, Mial TN, Plazyo O, Garcia-Flores V, Hassan SS, Xu Z,  
400 Tarca AL, Drewlo S, Gomez-Lopez N. An M1-  
401 like Macrophage Polarization in Decidual Tissue during Spontaneous Preterm Labor That Is  
402 Attenuated by Rosiglitazone Treatment. *J Immunol.* 2016 Mar 15;196(6):2476-2491.  
403  
404 Zeldovich VB, Bakardjiev AI. Host defense and tolerance: unique challenges in the placenta.  
405 *PLoS Pathog.* 2012;8(8):e1002804  
406  
407 Zhang YH, He M, Wang Y, Liao AH. Modulators of  
408 the Balance between M1 and M2 Macrophages during Pregnancy. *Front Immunol.* 2017 Feb  
409 9;8:120

410 *Figure Legends:*

411 **Fig. 1. Perforin-2 limits *L. monocytogenes* infection of the placenta and fetus.** Pregnant  
412 *Perforin-2 (P2) +/+* and *-/-* mice were infected intravenously on GD 12.5 with  $2.5 \times 10^5$  CFU of  
413 *L. monocytogenes* for 44 hours. Bacterial loads were then determined in each individual liver,  
414 placenta, and fetus by CFU assay. Shown are the compiled results of two separate infection  
415 experiments using a total of 3 pregnant mice per genotype harboring a total of either 22 FPU<sub>s</sub> (*P2*  
416 *+/+*) or 17 FPU<sub>s</sub> (*P2 -/-*). Mann-Whitney U test used to calculate p-values.

417

418 **Fig. 2: Both maternal- and fetal-encoded Perforin-2 contribute to protection of the placenta**  
419 **and fetus.** A heterogenic mating strategy was used to generate pregnant mice that possessed  
420 fetuses that were either *Perforin-2 (P2) +/-* or *-/-*. Pregnant mice (GD 12.5) were infected  
421 intravenously with  $2.5 \times 10^5$  CFU *L. monocytogenes* for 44 hrs. **(A)** A representative cross is  
422 shown between a *P2 -/-* female and a *P2 +/-* male. Following infection, FPU<sub>s</sub> (N=10) were  
423 dissected, bacterial loads determined in each individual placenta and fetus by CFU assay, and  
424 individual fetuses genotyped. In the example shown, fetuses #1-4 are *P2 +/-* and #5-10 are *P2 -/-*  
425 . Asterisk denotes CFU values below detection limit. **(B)** Compiled analysis of crosses between  
426 *P2 -/-* females, N=5 and *P2 +/-* males in which FPU<sub>s</sub> lack maternal-derived P2, designated as  
427 M(-/-). Placentas associated with *P2 +/-* fetuses (e.g., fetuses 1-4 in **(A)**) possess trophoblasts  
428 T(+/-) with fetal-derived P2. Placentas associated with *P2 -/-* fetuses (e.g., fetuses 5-10 in **(A)**)  
429 possess trophoblasts T(-/-) that lack fetal-derived P2. **(C)** Similar compiled analysis of crosses  
430 between *P2 +/-* females, N=5 and *P2 -/-* males in which FPU<sub>s</sub> possess maternal-derived P2,  
431 designated as M(+/-). Placentas associated with *P2 +/-* fetuses possess trophoblasts, designated  
432 as T(+/-), with fetal-derived P2. Placentas associated with *P2 -/-* fetuses possess trophoblasts,

433 designated as T(-/-), that lack fetal-derived P2. Compiled data drawn from three independent  
434 infections performed on separate days. Mann-Whitney U test was used to calculate p-values. (NS  
435 = not significant)

436

437 **Fig. 3: Composition of immune cells in liver and decidua of uninfected and infected GD12.5**  
438 **pregnant mice.** Pregnant mice (GD 12.5) were either uninfected or intravenously infected with  $1$   
439  $\times 10^6$  CFU of *L. monocytogenes* for 44 h. Single-cell preparations of the indicated tissue were  
440 analyzed by flow cytometry for expression of immune- and myeloid-specific markers. **(A)** The  
441 percentage of cells staining positive for the immune-specific cell surface marker CD45 per  $10^6$   
442 isolated total live liver cells shown from an uninfected and infected mouse. The left panel shows  
443 the staining profile of CD45-staining liver cells from an individual uninfected dam (top) and an  
444 individual infected dam (bottom). The right panel shows the expression levels of myeloid-  
445 specific markers CD11b and F4/80 of the CD45<sup>+</sup> cells. **(B)** For the same mice, the percentage of  
446 cells staining positive for the immune-specific cell surface marker CD45 per  $10^6$  isolated total  
447 live decidual cells are shown. The left panel shows the staining profile of CD45-staining  
448 decidual cells from an individual uninfected dam (top) and an individual infected dam (bottom)  
449 and the right panel shows the expression levels of myeloid-specific markers CD11b and F4/80 of  
450 the CD45<sup>+</sup> cells. Shown is a representative mouse from 3 mice per group.

451

452 **Fig. 4: *Perforin-2* expression is induced in decidual and splenic immune cells following**  
453 **infection** Pregnant BALB/c mice (GD12.5) were infected intravenously with  $5 \times 10^5$  -  $1 \times 10^6$  CFU  
454 of *L. monocytogenes* for 44 hrs and decidual and splenic cells were analyzed for *P2* mRNA levels.

455 (A) Representative contour plots of background (FMO), uninfected, and infected cells gated on  
456 live, CD45<sup>+</sup> cells expressing AF-647 (P2). Histogram overlay of uninfected (red) and infected  
457 (blue) CD45<sup>+</sup> decidual cells showing *Perforin-2* (P2) mRNA levels. (B) Compiled analysis of P2  
458 percentage and mean fluorescence intensity (MFI) of P2 expression on CD45<sup>+</sup> cells in decida and  
459 spleen. Compiled data drawn from two independent infections performed on separate days.  
460 Student's T-test was used to calculate p-values.

461  
462 **Fig. 5: Specific *Perforin-2* induction in decidual and splenic macrophages of BALB/c and**  
463 **C57BL/6 dams following infection.** Pregnant BALB/c (A-C) and C57BL/6 (D-F) mice (GD12.5)  
464 were infected intravenously with  $5 \times 10^5$  -  $1 \times 10^6$  CFU of *L. monocytogenes* for 44 hrs and decidual  
465 and splenic macrophages were analyzed for *Perforin-2* (P2) mRNA levels. (A,D) Representative  
466 contour plots of background (FMO), uninfected, and infected cells gated on live macrophages  
467 expressing AF-647 (P2). Histogram overlay of uninfected (red) and infected (blue) CD45<sup>+</sup> decidual  
468 macrophages showing P2 mRNA levels. Compiled analysis of P2 percentage and mean  
469 fluorescence intensity (MFI) of P2 expression in decidual macrophages (B,E) and spleen (C,F).  
470 Compiled data drawn from two independent infections performed on separate days. Student's T-  
471 test used to calculate p-values.

472  
473 **Fig. 6: Divergent *Perforin-2* expression in decidual and splenic macrophages following lower-**  
474 **dosed infections.** Pregnant BALB/c (A-C) or C57BL/6 (D,E) mice (GD 12.5) were infected  
475 intravenously with  $2.5 \times 10^5$  CFU of *L. monocytogenes* for 44 hrs and single-cell preparations of  
476 decidual and splenic macrophages were analyzed for *Perforin-2* (P2) mRNA levels and shown as  
477 described in Fig. 5. Student's T-test used to calculate significance. (NS = not significant)

478

479 **Fig. 7: Decidual macrophages polarize to a M1 phenotype following high-dose infection.**

480 Pregnant mice (GD 12.5) were either uninfected or intravenously infected with  $1 \times 10^6$  CFU  
481 (PD<sub>100</sub>) of *L. monocytogenes* for 44 h. Single-cell preparations of deciduas were analyzed by flow  
482 cytometry for expression of M1 and M2 macrophage-specific markers. **(A)** Gating strategy used  
483 to define macrophages (single, live, CD45<sup>+</sup>, CD11b<sup>+</sup>, F4/80<sup>+</sup>, Ly6C<sup>-</sup>, Ly6G<sup>-</sup>). Gating strategy and  
484 proportions of M2 (CD206<sup>+</sup>, MHCII<sup>lo</sup>) and M1 (CD206<sup>-</sup>, MHCII<sup>hi</sup>) macrophages in a  
485 representative uninfected **(B)** and PD<sub>100</sub> infected **(C)** dam (GD 12.5). **(D)** Compiled analysis of  
486 M1 and M2 decidual macrophages by percentage in uninfected and PD<sub>100</sub> infected dams. Results  
487 based on 4 mice analyzed on several different days. Student's T-test was used to calculate p-values.  
488

489 **Fig. 8: *Perforin-2* is expressed preferentially in decidual M1 macrophages.** Decidual cells  
490 were isolated from uninfected pregnant *Perforin-2* (*P2*) <sup>+/+</sup> BALB/c mice (GD 12.5) and M1  
491 and M2 macrophages were analyzed for *P2* mRNA. **(A)** Representative contour plots are shown  
492 of background (FMO) and uninfected M1 (top) and M2 (bottom) macrophages expressing AF-  
493 647 (*P2*). Histogram overlay plots of individual dams showing *P2* mRNA levels in M1 (clear)  
494 and M2 (grey filled) decidual macrophages. **(B)** Compiled analysis of *P2* mRNA levels in M1  
495 and M2 macrophages by percentage and mean fluorescence intensity (MFI) in decidua. Results  
496 based on 5 uninfected dams. Student's T-test used to calculate p-values.

Fig. 1

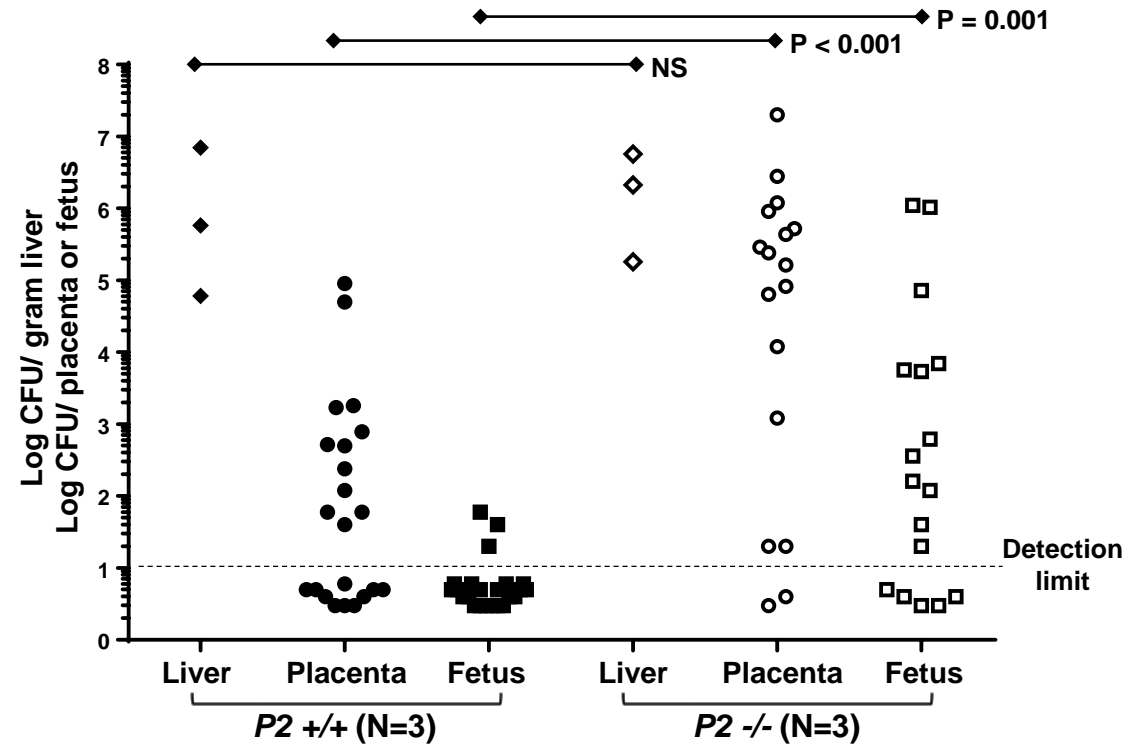

# Fig. 2

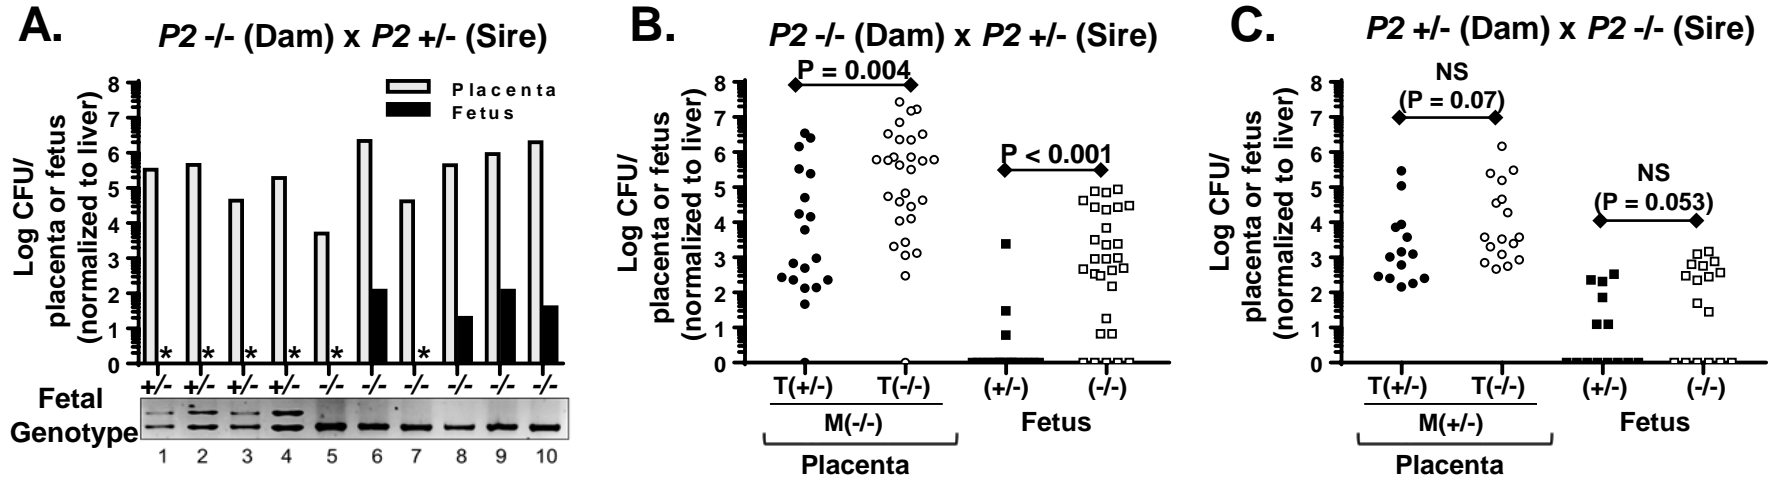



**Fig. 3**

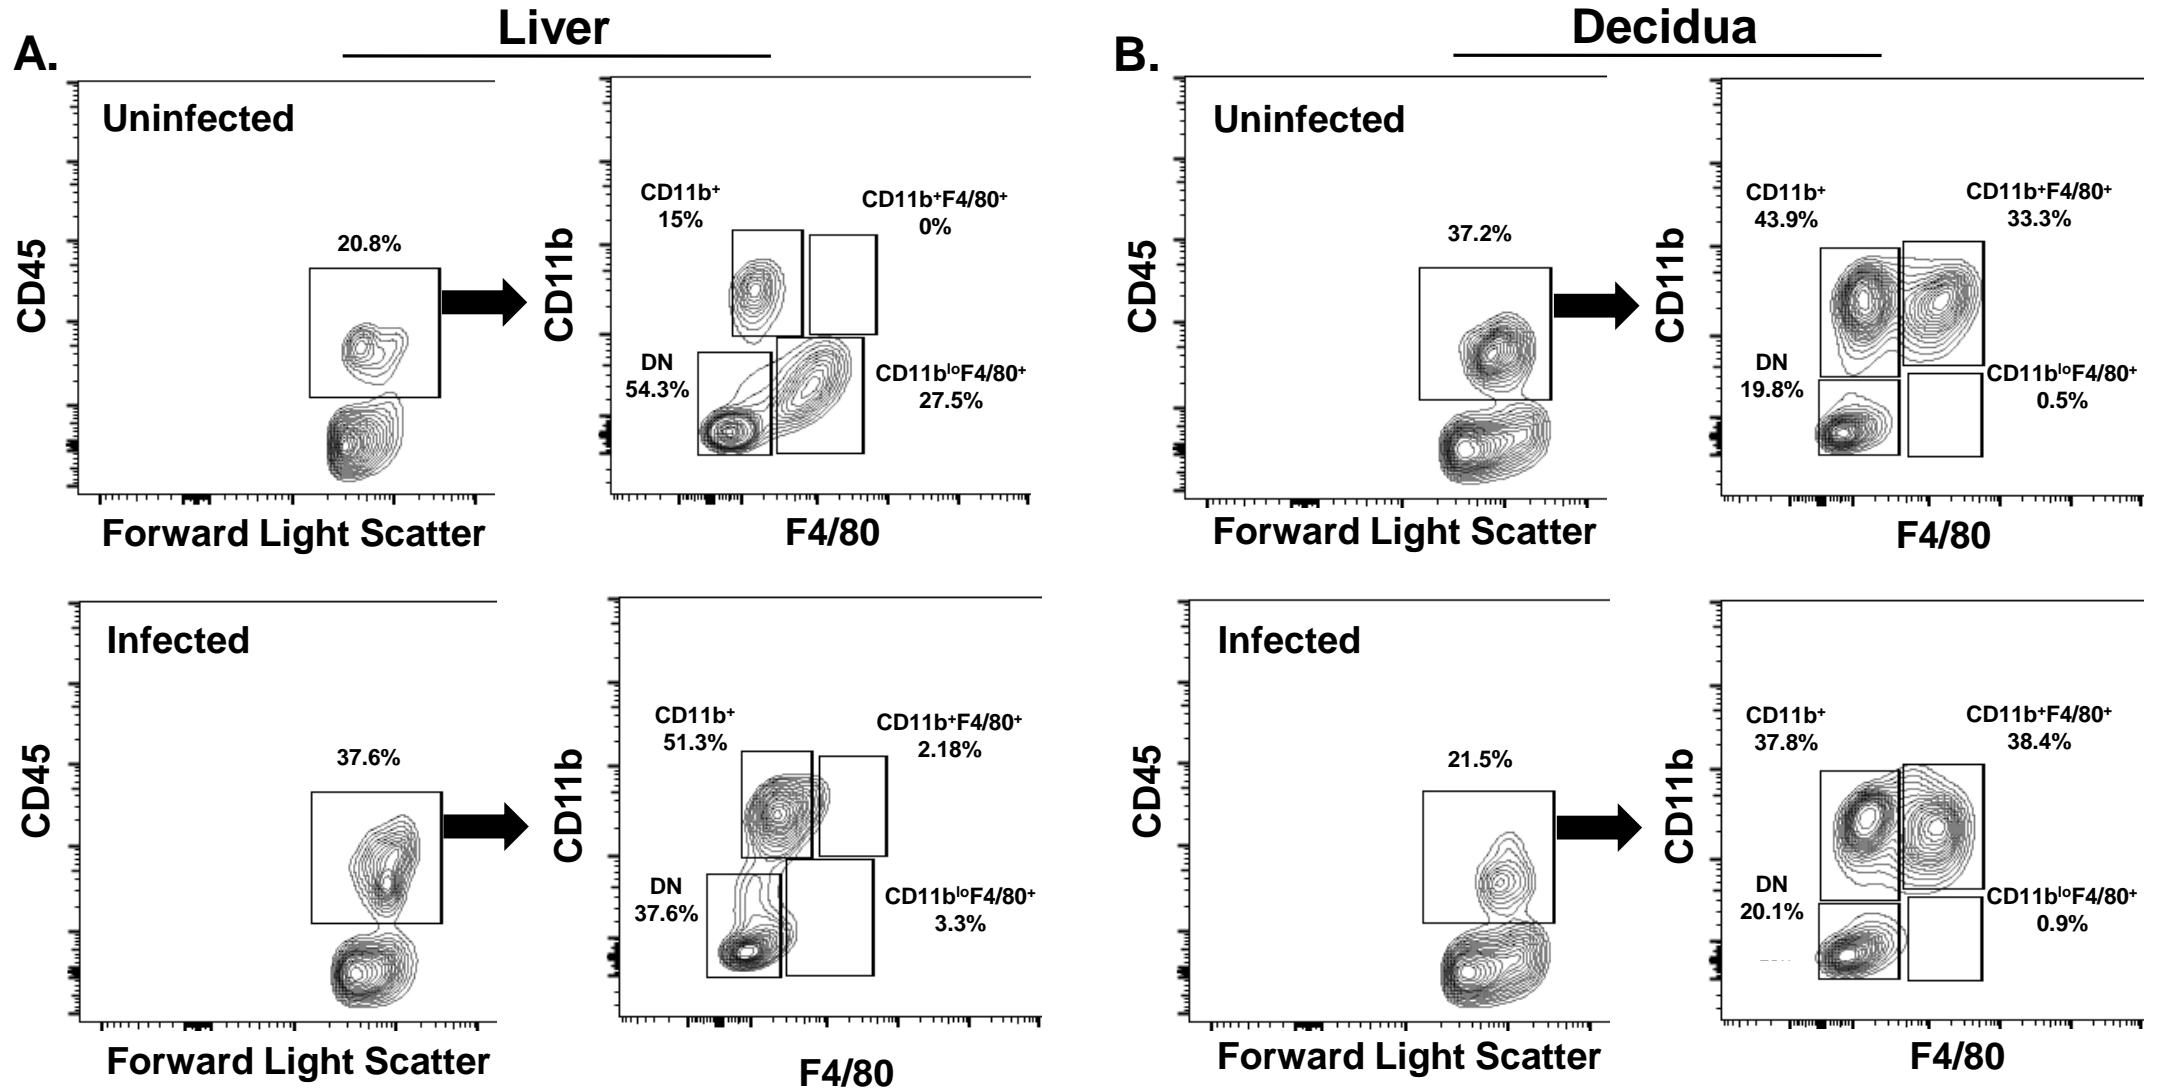

Fig. 4

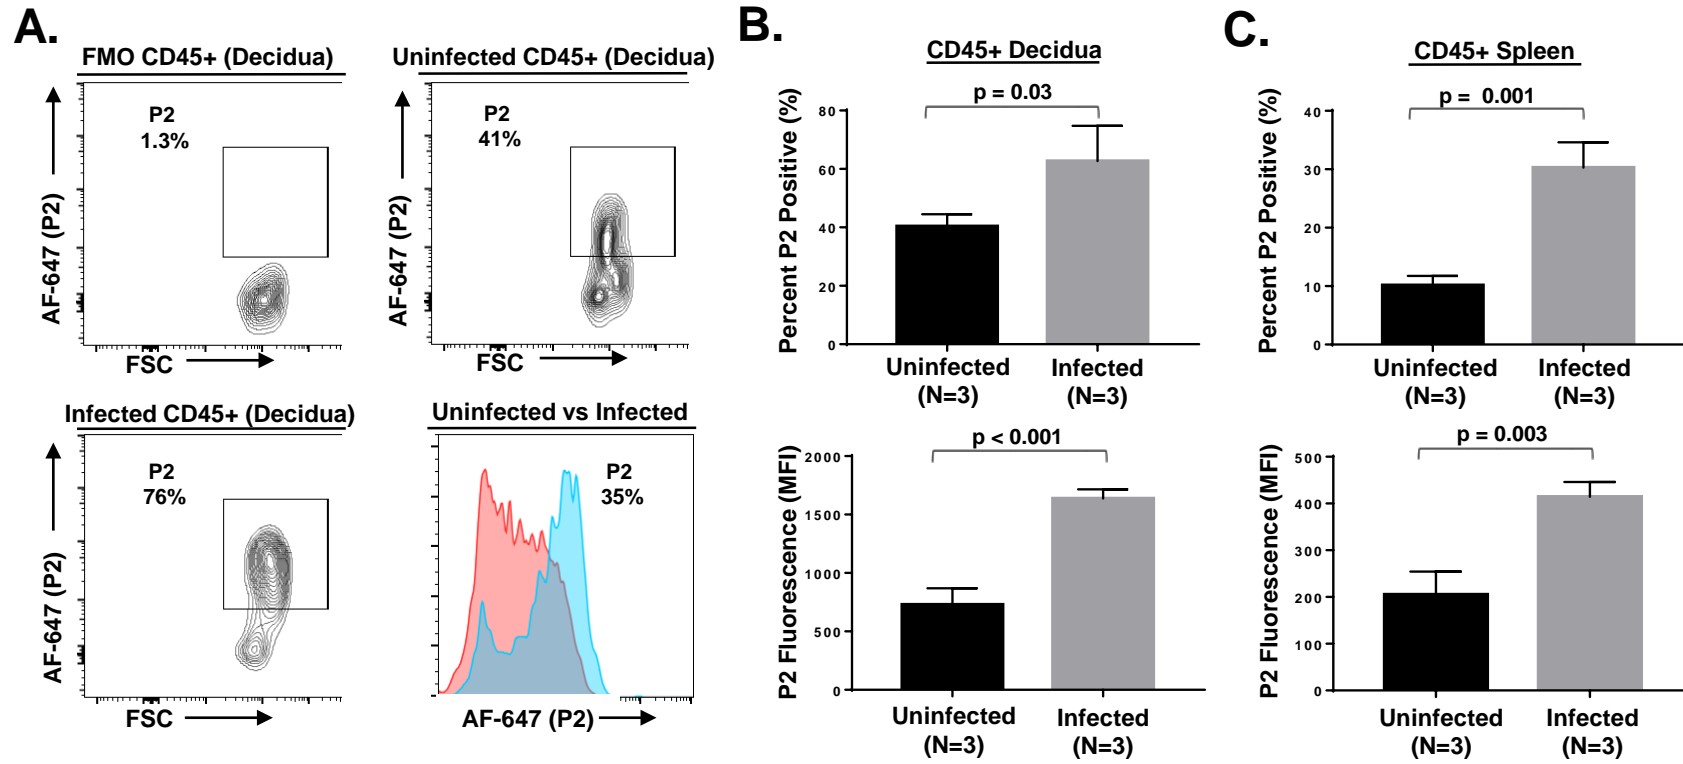

Fig. 5A,B,C

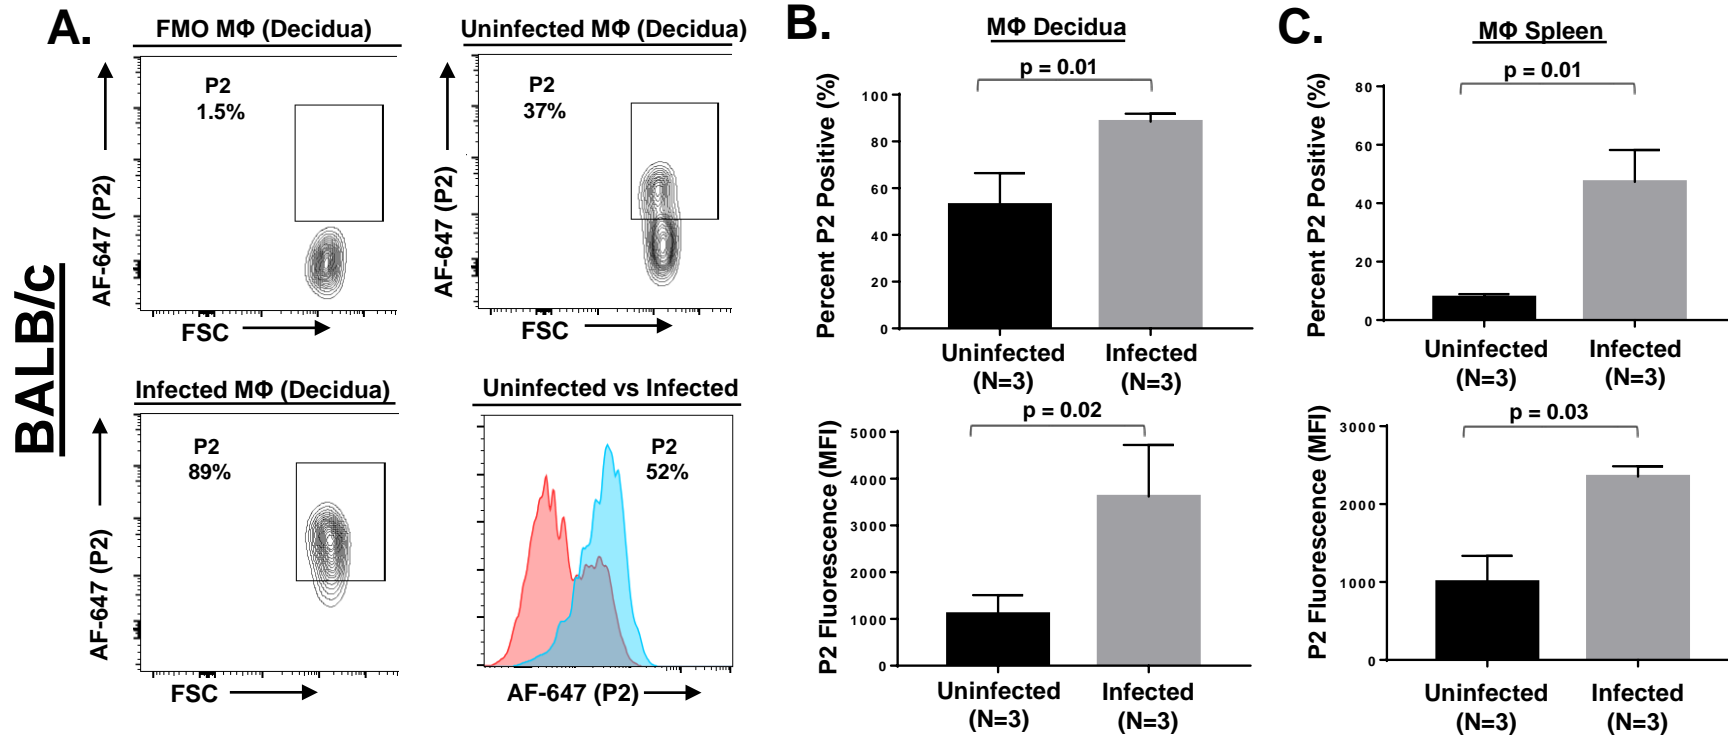

Fig. 5D,E,F

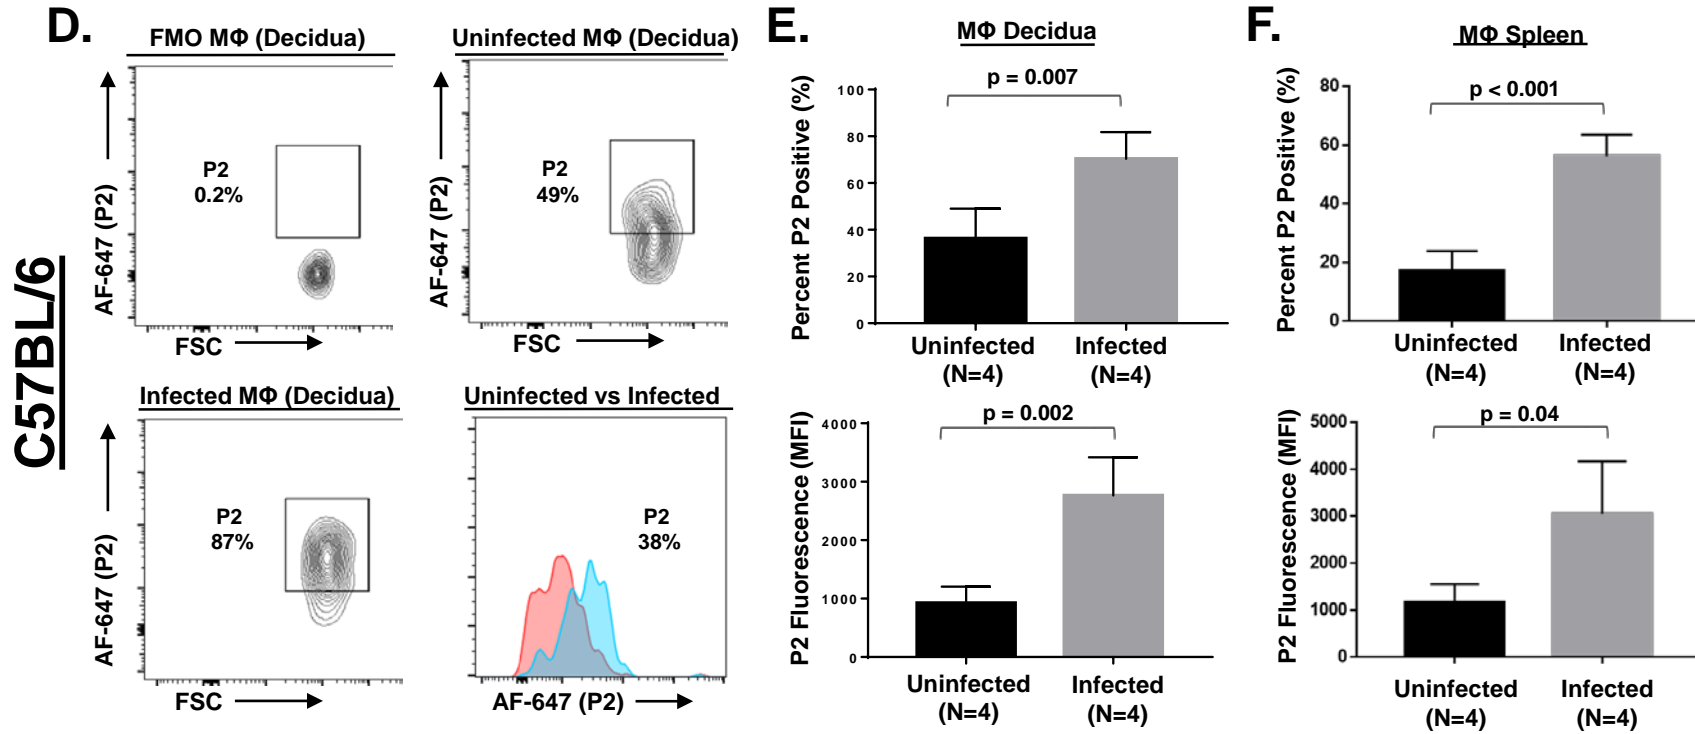

**Fig. 6**

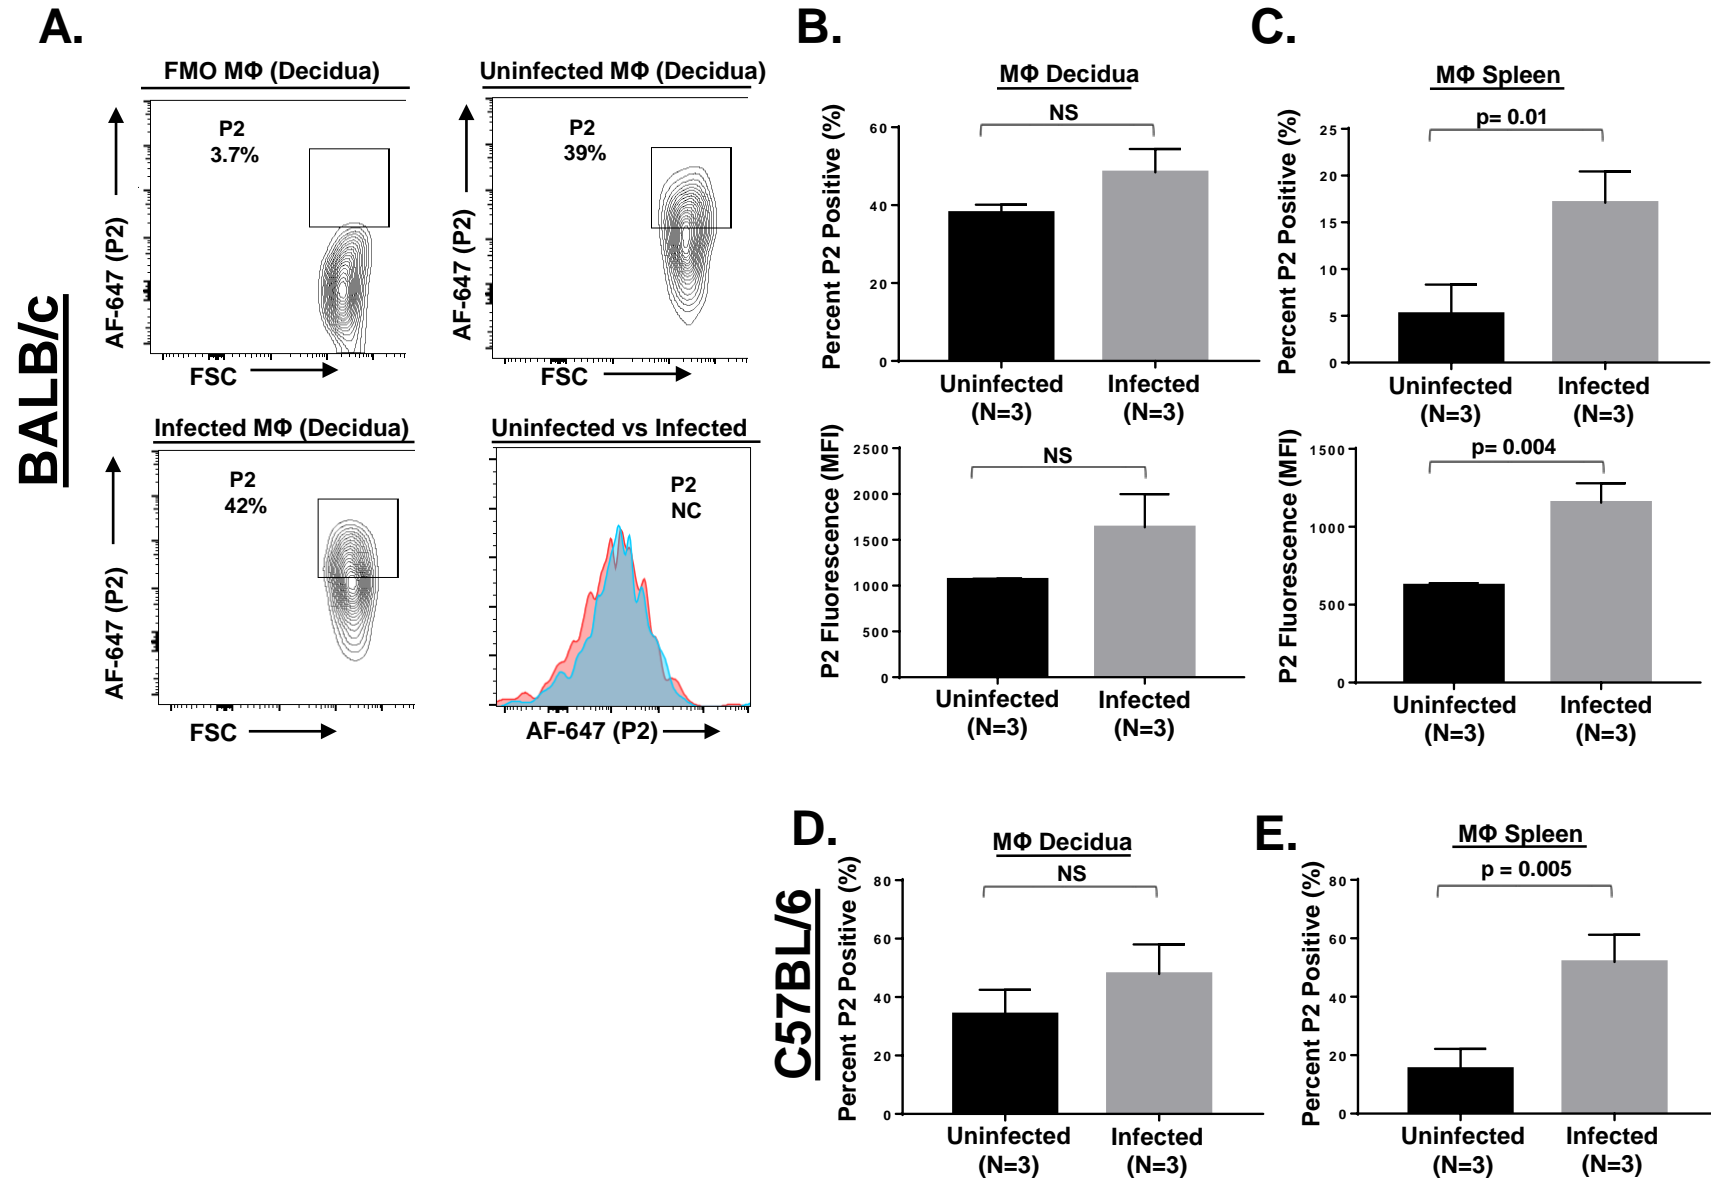

**Fig. 7**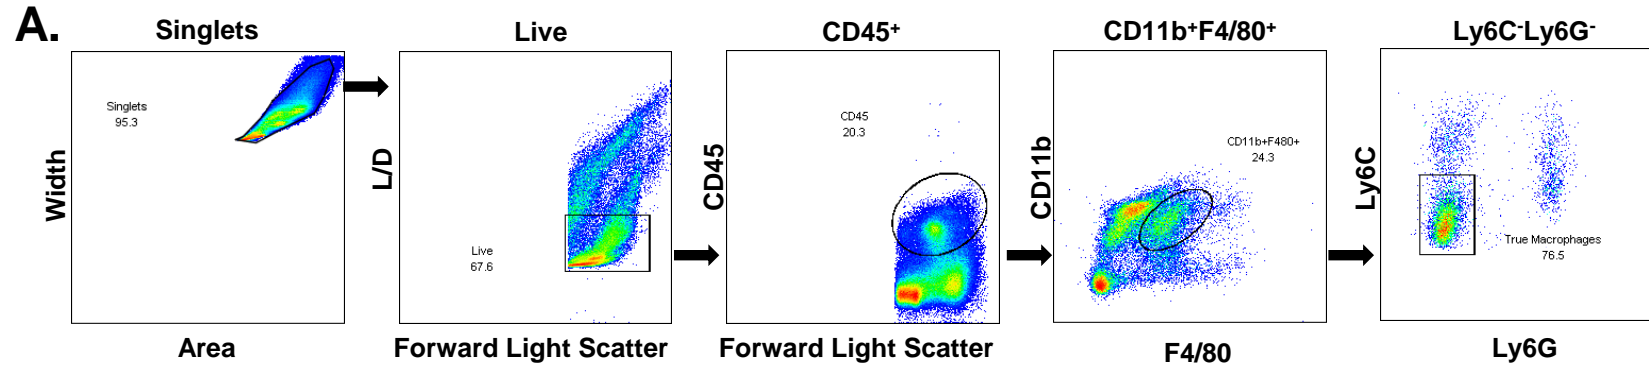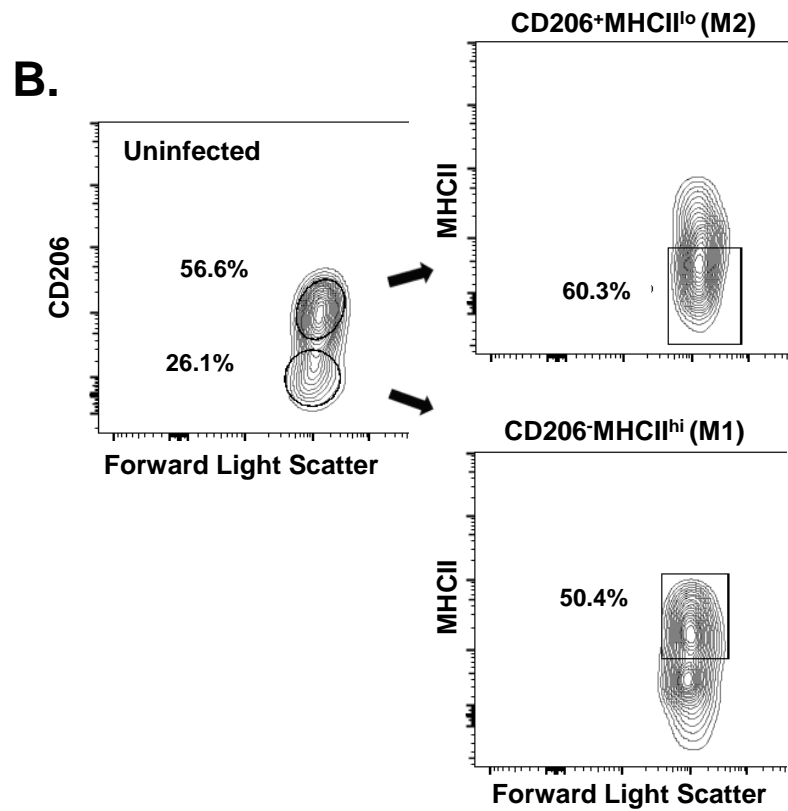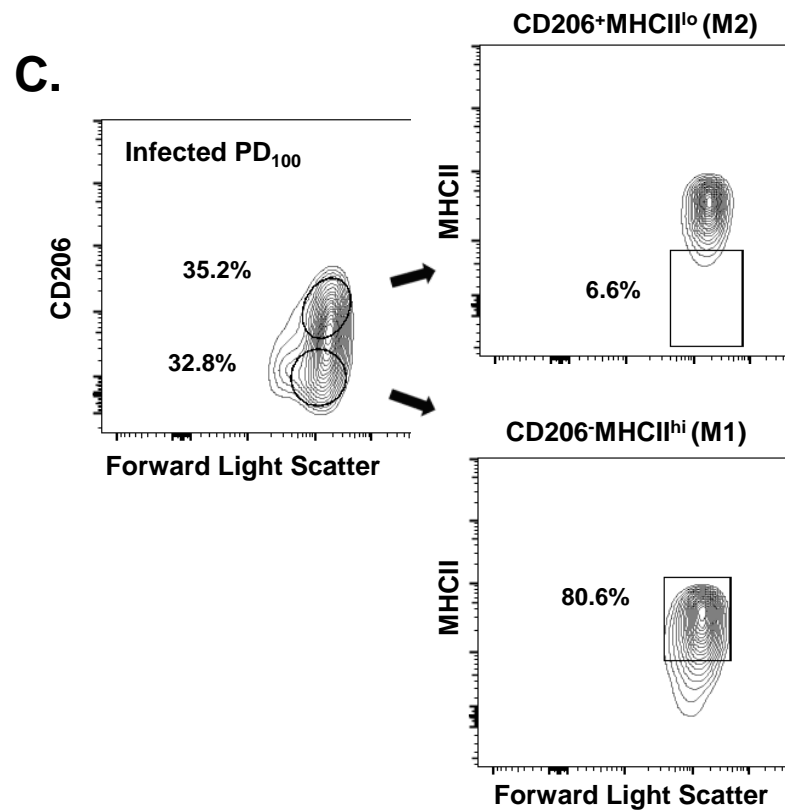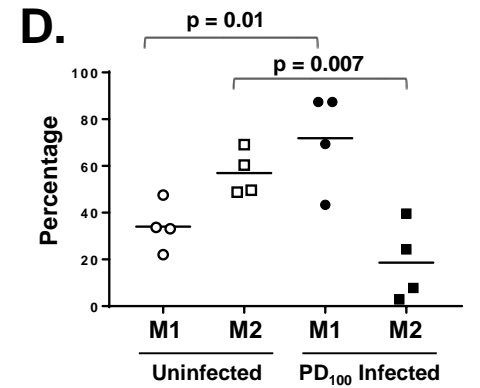

**Fig. 8**

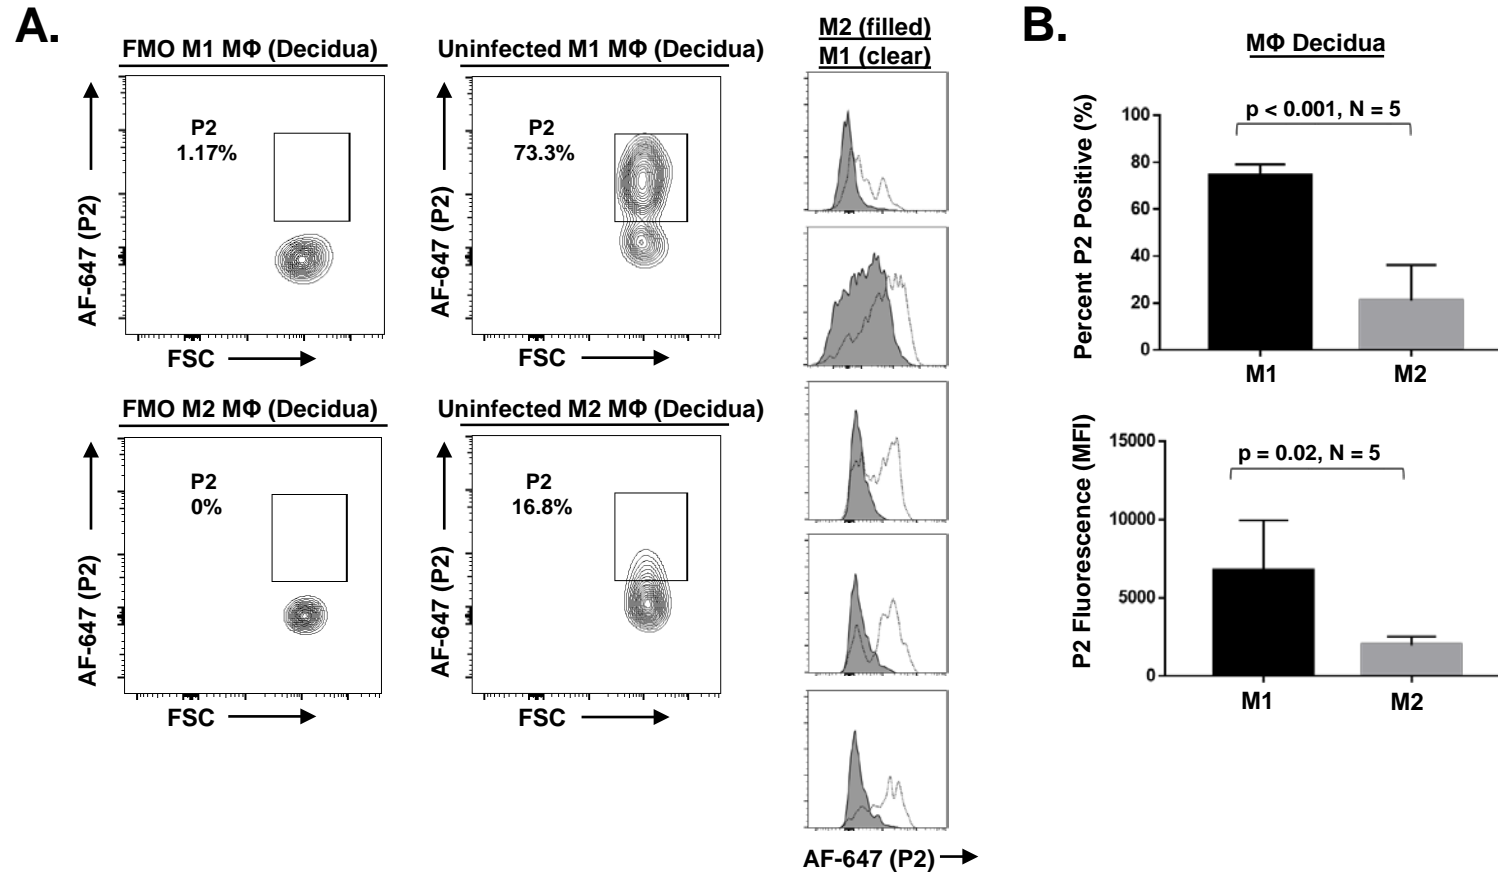

Source: https://www.biorxiv.org/content/biorxiv/early/2020/05/22/2020.05.20.107193.full.pdf
